# Supplementary material for: Genome Wide Mapping Reveals PDE4B as an IL-2 Induced STAT5 Target Gene in Activated Human PBMCs and Lymphoid Cancer Cells
Source: PLoS One. 2013 Feb 25;8(2):e57326. doi: 10.1371/journal.pone.0057326 (PMC3581501; doi:10.1371/journal.pone.0057326)
Supplement: Table S1 — Select putative IL-2 sensitive STAT5 target genes. Table shows the 57 intersect genes chosen for validation with their genomic locations in relation to the corresponding regulated gene as well as their RefSeq IDs. Genomic locations are marked as follows: Pp, Proximal Promoter; ID, Immediate Downstream; En, Enhancer; E, Exon. (XLSX) [file pone.0057326.s005.xlsx]

## Sheet: Sheet1
	Symbol	RefSeq		Genomic Location
En	ABCE1	NM_002940		Pp, Proximal Promoter	30
En	AHR	NM_001621		ID, Immediate Downstream	7
Ex	BCL2	NM_000633		En, Enhancer	14
Pp	BCL6	NM_001706		E, Exon	6
Pp	CCR6	NM_004367			57
Pp	CD69	NM_001781
ID	CDK6	NM_001259
En	CDKN2C	NM_078626
Pp	CREM	NM_183011
Pp	CTSC	NM_001814
Pp	CYP7B1	NM_004820
Pp	DDX5	NM_004396
Pp	EMP1	NM_001423
Pp	EPHA4	NM_004438
Ex	HLF	NM_002126
Pp	IDI1	NM_004508
En	IDI2	NM_033261
En	IGFBP3	NM_000598
Pp	IGSF11	NM_152538
Pp	IL2RA	NM_000417
ID	IL7R	NM_002185
Pp	KLF6	NM_001300
Pp	LCP2	NM_005565
En	LMO4	NM_006769
ID	LRMP	NM_006152
ID	MAP3K4	NM_005922
Pp	MINA	NM_153182
ID	MKI67IP	NM_032390
Ex	MMD	NM_012329
Pp	NETO2	NM_018092
En	OSBPL3	NM_015550
Pp	PAPD1	NM_018109
Pp	PDE4B	NM_002600
ID	PIK3R3	NM_003629
Pp	PPARG	NM_015869
Pp	PPIL1	NM_016059
Pp	PPP2R5C	NM_178588
En	RAFTLIN	NM_144629
ID	RASA2	NM_006506
Pp	RBMS1	NM_002897
Ex	RRAS2	NM_012250
Pp	RUNX1	NM_001754
Pp	SLC20A1	NM_005415
Ex	SLC2A3 (GLUT3)	NM_006931
Pp	SLC30A7	NM_133496
Pp	STIP1	NM_006819
En	STK17B	NM_004226
Pp	SYNCRIP	NM_006372
En	TAGAP	NM_054114
En	TANK	NM_004180
Ex	TJP1	NM_175610
Pp	UBE2W	NM_018299
En	UGP2	NM_006759
En	VCAM1	NM_001078
Pp	WDFY3	NM_178585
En	WDR3	NM_006784
Pp	ZNF217	NM_006526
